# Supplementary material
Source: PubMed Central journal article supplement (PMC6813870)
Supplement: NIHMS1047836-supplement-Supplemental_Material.pdf [file NIHMS1047836-supplement-Supplemental_Material.pdf]

## Supplemental Table 1

*Trauma-Related Experiences (TREs) Endorsed on the STRESS-A*

| TRE Domains and Items                                                                              | %    |
|----------------------------------------------------------------------------------------------------|------|
| Non-Interpersonal Trauma                                                                           | 47.6 |
| Ever been in a really bad storm or disaster, like a flood, earthquake or hurricane                 | 12.9 |
| Ever been in a serious fire or lost your home in a fire                                            | 8.8  |
| Ever been in a really bad car accident                                                             | 25.9 |
| Ever had to stay in the hospital because you were really sick/badly injured                        | 24.1 |
| Adult Domestic Violence                                                                            | 20.0 |
| Adult living in home/ partner ever beaten you so badly that you had bruises, cuts, or injuries     | 6.5  |
| Adult living in home/partner ever told you over and over you were no good or repeatedly insulted   | 8.2  |
| Adult living in home/partner made you feel so scared you thought they might badly hurt or kill you | 7.1  |
| Adult living in your home/partner ever slapped, punched, shoved, or kicked you                     | 14.7 |
| Ever thought that an adult living in home/ partner was going to really hurt/kill someone you love  | 3.5  |
| Adult living in home/partner ever forced you to have sex or engage in sexual behavior              | 3.5  |
| Adult Physical Threatening/Assault                                                                 | 11.8 |
| Excluding adults in home/partner, has anyone ever told you they were going to hurt/kill you        | 7.1  |
| Excluding adults in home/partner, anyone made you so scared, thought they might hurt/kill you      | 5.9  |
| Excluding adults in home/partner, thought someone was going to really hurt/kill someone you love   | 4.1  |

|                                                                                                          |      |
|----------------------------------------------------------------------------------------------------------|------|
| Adult Sexual Assault                                                                                     | 8.8  |
| Excluding adults in home/partner, anyone ever forced you to have sex or engage in sexual behavior        | 8.8  |
| Adult Witness to Community Violence                                                                      | 17.6 |
| Ever seen/heard people in neighborhood get badly hurt or killed                                          | 17.6 |
| Adult Loss/Illness                                                                                       | 62.9 |
| Your child ever had to stay in hospital because were really sick/badly injured                           | 23.5 |
| Lost a child to death                                                                                    | 5.9  |
| Excluding your child, family member ever had to stay in hospital because really sick/badly injured       | 41.2 |
| Know so much about how someone you loved died that you pictured it in your head                          | 27.6 |
| Adult War/Combat                                                                                         | 5.9  |
| You or anyone in your family been in an actual war                                                       | 5.9  |
| Child Physical Abuse                                                                                     | 10.6 |
| Excluding adults in home/partner, anyone beaten you so badly you had bruises, cuts, or injuries          | 8.5  |
| Adults in your home ever slap, punch, or kick you                                                        | 8.2  |
| Adults in home ever hit so hard you had bruises or red marks                                             | 9.4  |
| Child Sexual Abuse                                                                                       | 19.4 |
| Anyone try to touch your private body parts/make you touch their private body parts when did not want to | 16.5 |
| Anyone touch your private body parts/make you touch their private body parts when did not want to        | 15.3 |
| Anyone much older ever touch your private body parts, whether you wanted them to or not                  | 14.7 |

|                                                                                           |      |
|-------------------------------------------------------------------------------------------|------|
| Child Witness to Domestic Violence                                                        | 13.5 |
| Ever see/hear adults in home beat each other up or throw things at each other             | 13.5 |
| Uncategorized Trauma                                                                      | 25.9 |
| Anything else really scary/very bad ever happen to you (in adulthood)                     | 14.1 |
| Anything else really scary/very bad ever happen to you (in childhood)                     | 16.5 |
| Other Adversities                                                                         | 67.1 |
| Ever been homeless                                                                        | 20.6 |
| Ever really hungry because your family did not have enough to eat                         | 10.0 |
| Adults in home [did not] make sure you went to school                                     | 19.4 |
| Ever separated from someone who you depended on for love/safety for more than few days    | 15.9 |
| Ever know about/see a family member being arrested or put in jail                         | 36.5 |
| Told over and over you were no good or people you live with would leave you/send you away | 10.0 |

---

*Note.*  $N = 170$ . Item questions are paraphrased. Stress TRE items are categorized beneath broader TRE Domains. Total PTSD Qualifying Domains (non-interpersonal trauma, adult domestic violence, adult physical threatening/assault, adult sexual assault, adult witness to community violence, adult loss/illness, adult war/combat, child physical abuse, child sexual abuse, child witness to domestic violence:  $M = 2.34$ ,  $SD = 2.03$ ,  $Range = 0 - 10$ ).

Supplemental Table 2

*Correlation Matrix of STRESS TRE Domains, Symptoms, and Impairment*

| Variable             | Intrusive | Avoidance | Mood/<br>Cognition | Arousal/<br>Reactivity | Dissociation | Total<br>Symptoms |
|----------------------|-----------|-----------|--------------------|------------------------|--------------|-------------------|
| Total Trauma Domains | .36***    | .34***    | .25**              | .23*                   | .20*         | .31***            |
| Intrusive            | —         | .75***    | .77***             | .76***                 | .66***       | .89***            |
| Avoidance            |           | —         | .76***             | .78***                 | .70***       | .86***            |
| Mood/Cognition       |           |           | —                  | .86***                 | .76***       | .95***            |
| Arousal/Reactivity   |           |           |                    | —                      | .80***       | .94***            |
| Dissociation         |           |           |                    |                        | —            | .81***            |

*Note.*  $N = 170$ .\*  $p < .05$ , \*\*  $p < .01$ , \*\*\*  $p < .001$

Supplemental Table 3

*Pearson Correlations between STRESS Variables and Alternative Measures of Adversity and Trauma*

| Variable             | CTS-2                         |                   |                                   |                            |
|----------------------|-------------------------------|-------------------|-----------------------------------|----------------------------|
|                      | Child Trauma<br>Questionnaire | Life Events Scale | Psychological<br>Partner Violence | CTS-2<br>Physical Violence |
|                      | Total Severity                | Total Events      | Chronicity                        | Chronicity                 |
| Total Trauma Domains | .49***                        | .36***            | .41***                            | .31***                     |
| Intrusive            | .25**                         | .27***            | .23**                             | .14                        |
| Avoidance            | .13                           | .33***            | .21*                              | .13                        |
| Mood/Cognition       | .22*                          | .25**             | .19*                              | .14                        |
| Arousal/Reactivity   | .15                           | .27**             | .19*                              | .12                        |
| Dissociation         | .13                           | .14*              | .12                               | .05                        |
| Total Symptoms       | .21*                          | .30**             | .22**                             | .14                        |

*Note.*  $N = 170$ . CTS-2 = Revised Conflict Tactics Scales

\*  $p < .05$ , \*\*  $p < .01$ , \*\*\*  $p < .001$

Supplemental Table 4

*STRESS-A Item Loadings for Confirmatory Factor Analytic Models with Binary Outcomes*

|                | Symptom Criteria       | DSM-5 | Anhedonia | Hybrid    | DSM-IV    | 1-Factor |
|----------------|------------------------|-------|-----------|-----------|-----------|----------|
| B <sub>1</sub> | Memories               | .67   | .67 (I)   | .67 (I)   | .67 (I)   | .82      |
| B <sub>2</sub> | Dreams/nightmares      | .78   | .78 (I)   | .78 (I)   | .78 (I)   | .74      |
| B <sub>3</sub> | Re-experiencing        | .84   | .84 (I)   | .84 (I)   | .84 (I)   | .80      |
| B <sub>4</sub> | Emotional distress     | .77   | .77 (I)   | .77 (I)   | .77 (I)   | .73      |
| B <sub>5</sub> | Physiological distress | .75   | .75 (I)   | .75 (I)   | .75 (I)   | .71      |
| C <sub>1</sub> | Avoid internal         | .95   | .95 (A)   | .95 (A)   | .85 (A/N) | .82      |
| C <sub>2</sub> | Avoid external         | .93   | .93 (A)   | .93 (A)   | .89 (A/N) | .88      |
| D <sub>1</sub> | Dissociative amnesia   | .76   | .75 (MC)  | .75 (NA)  | .85 (A/N) | .82      |
| D <sub>2</sub> | Negative beliefs       | .83   | .82 (MC)  | .82 (NA)  | .82 (A/N) | .81      |
| D <sub>3</sub> | Blame                  | .92   | .91 (MC)  | .91 (NA)  | .92 (A/N) | .91      |
| D <sub>4</sub> | Negative mood          | .87   | .86 (MC)  | .86 (NA)  | .86 (A/N) | .85      |
| D <sub>5</sub> | Anhedonia              | .76   | .78 (AN)  | .78 (A/N) | .75 (A/N) | .74      |
| D <sub>6</sub> | Detachment             | .83   | .86 (AN)  | .86 (A/N) | .83 (A/N) | .82      |
| D <sub>7</sub> | Numbing                | .89   | .92 (AN)  | .92 (A/N) | .88 (A/N) | .88      |
| E <sub>1</sub> | Irritability           | .90   | .88 (DA)  | .86 (E)   | .91 (H)   | .82      |
| E <sub>2</sub> | Risky behavior         | .88   | .86 (DA)  | .84 (E)   | .88 (H)   | .86      |
| E <sub>3</sub> | Hypervigilance         | .89   | .88 (AA)  | .93 (AA)  | .89 (H)   | .88      |
| E <sub>4</sub> | Startle                | .90   | .72 (AA)  | .95 (AA)  | .90 (H)   | .88      |
| E <sub>5</sub> | Concentration          | .90   | .93 (DA)  | .90 (DA)  | .90 (H)   | .87      |
| E <sub>6</sub> | Sleep disturbance      | .74   | .95 (DA)  | .74 (DA)  | .74 (H)   | .72      |

*Note.*  $N = 170$ . *DSM-5* = *Diagnostic and Statistical Manual of Mental Disorders-Fifth Edition*; *DSM-IV* = *Diagnostic and Statistical Manual of Mental Disorders-Fourth Edition*; I = Intrusive symptoms cluster, A = Avoidance cluster, MC = Mood/Cognitions cluster, AN = Anhedonia,

---

A/N = Avoidance/Numbing cluster, DA = Dysphoric Arousal cluster, AA = Anxious Arousal cluster, NA = Negative Affect, E = Externalizing, H = Hyperarousal cluster
